# Supplementary material
Source: Springer Nature journal article supplement (https://www.springermedizin.de/resource/supplementary/13005_2014_340_MOESM2_ESM.pdf/9625984)

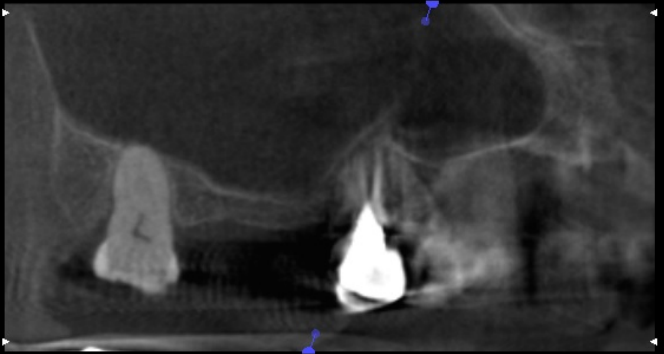

200 μm

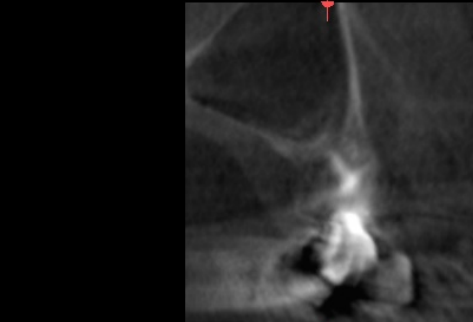

**A**

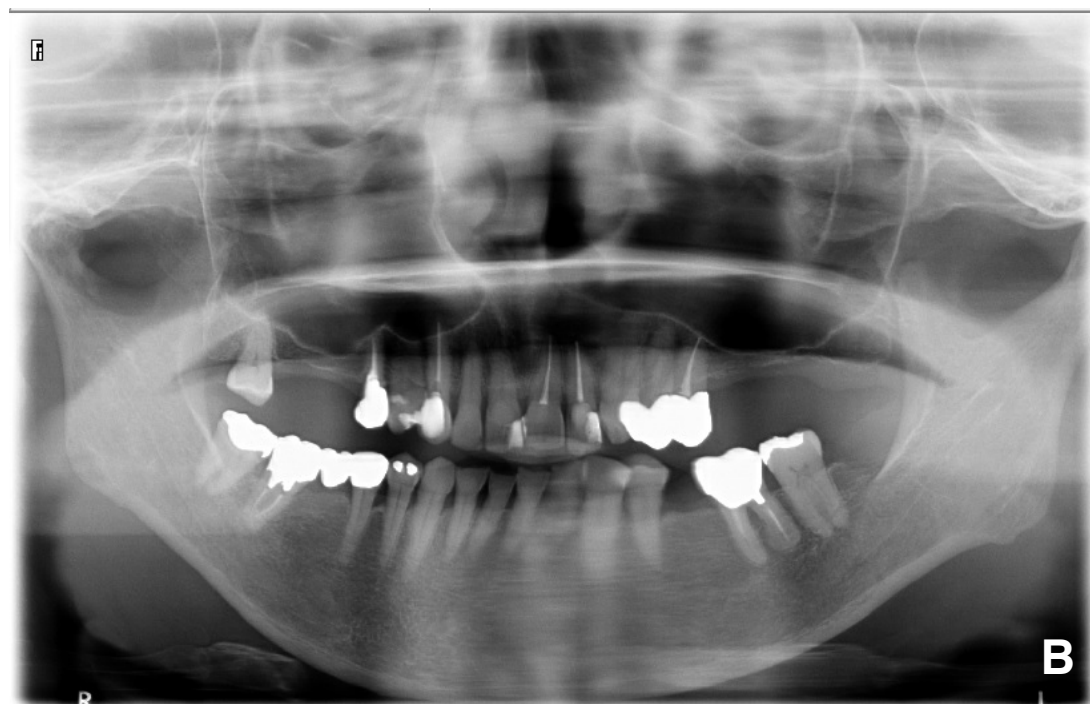

**B**

**B**

Supplement: MOESM2 [file 9625984]
